# Supplementary material for: New Insights into the Post-Translational Regulation of DNA Damage Response and Double-Strand Break Repair in Caenorhabditis elegans
Source: Oxford University Press journal article supplement (doi:10.1534/genetics.115.175661), 2015-03-26
Supplement: genetics.115.175661-4.pdf [file genetics.115.175661-4.pdf]

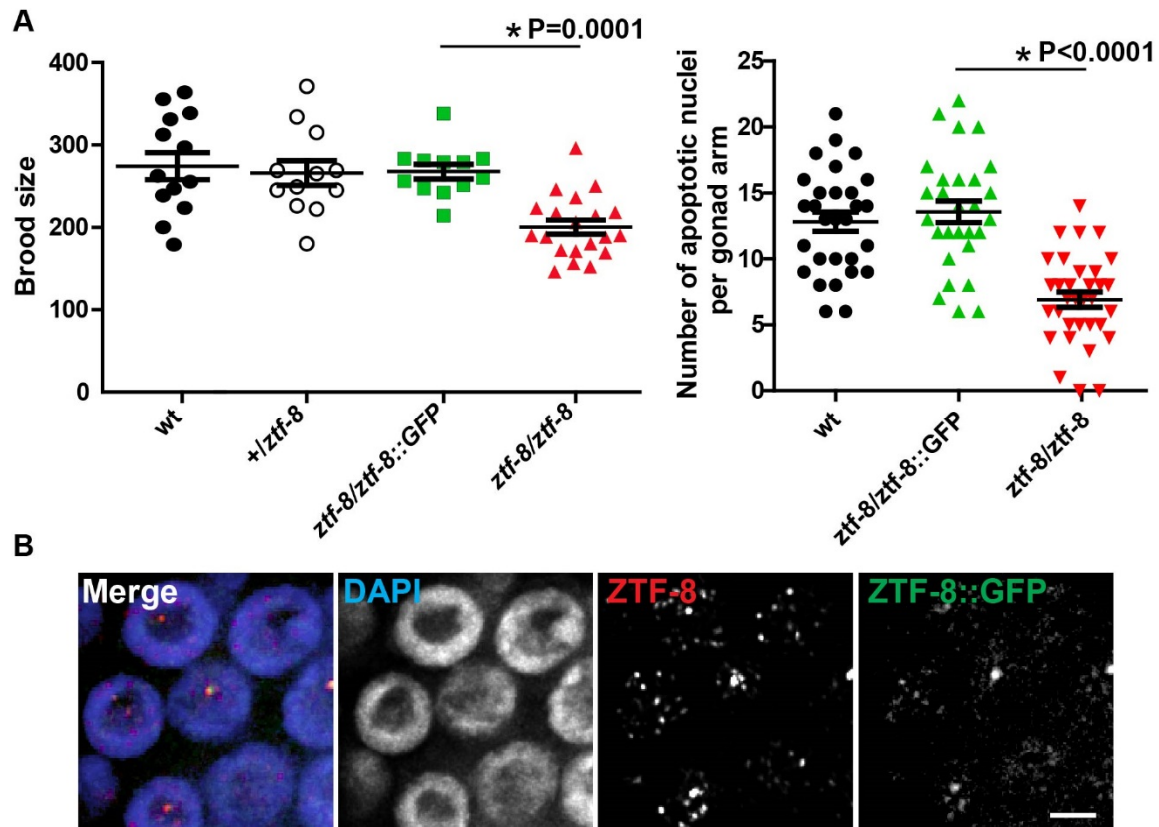

**Figure S2. GFP::FLAG-tagged ZTF-8 (*rj22*) is able to rescue the *ztf-8* null mutant phenotypes.**

**A.** Quantification of brood size and germline apoptosis in the indicated genotypes. Worms were treated with  $\gamma$ -IR (80 Gy) for apoptosis analysis. Asterisks indicate statistical significance compared to control by the Mann-Whitney test, 95% C.I. **B.** Co-staining with DAPI (blue) and an anti-ZTF-8 antibody (red) combined with detection of the endogenous GFP signal (green) in the ZTF-8::GFP::FLAG expressing worms. Of note, the endogenous GFP signal in this line is weaker than what is observed with an anti-GFP antibody. Bar, 2 $\mu$ m.
