# Supplementary material for: New Insights into the Post-Translational Regulation of DNA Damage Response and Double-Strand Break Repair in Caenorhabditis elegans
Source: Oxford University Press journal article supplement (doi:10.1534/genetics.115.175661), 2015-03-26
Supplement: genetics.115.175661-7.pdf [file genetics.115.175661-7.pdf]

Supporting Information

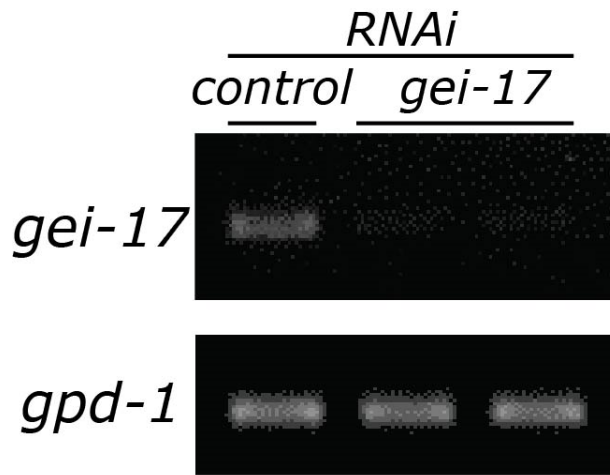

**Figure S1. RT-PCR analysis of RNA expression after *RNAi* depletion of *gei-17*.**

Single worm lysates were used for each reaction. The primer pairs used in amplification reactions span introns in *gei-17* or *gpd-1* to exclude genomic DNA contamination.
